# 1 DNA Release from Complex Plant Tissue using Focused Ultrasound Extraction (FUSE)

2

3 Alexia Stettinius<sup>1</sup>, Hal Holmes<sup>1,2</sup>, Qian Zhang<sup>3</sup>, Isabelle Mehochko<sup>1</sup>, Misa Winters<sup>2</sup>, Ruby Hutchison<sup>1</sup>, Adam  
4 Maxwell<sup>4</sup>, Jason Holliday<sup>3</sup>, Eli Vlasisavljevich<sup>1</sup>

5

6 <sup>1</sup>Department of Biomedical Engineering and Mechanics, Virginia Polytechnic Institute and State  
7 University, Blacksburg, VA, USA

8 <sup>2</sup>Conservation X Labs, Seattle, WA, USA

9 <sup>3</sup>Department of Forest Resources and Environmental Conservation, Virginia Polytechnic Institute and  
10 State University, Blacksburg, VA, USA

11 <sup>4</sup>Department of Urology, University of Washington, Seattle, WA, USA

12

## 13 **Abstract:**

14 Sample preparation in genomics is a critical step that is often overlooked in molecular  
15 workflows and impacts the success of downstream genetic applications. This study explores the  
16 use of a recently developed focused ultrasound extraction (FUSE) technique to enable the rapid  
17 release of DNA from plant tissues for genetic analysis. FUSE generates a dense acoustic  
18 cavitation bubble cloud that pulverizes targeted tissue into acellular debris. This technique was  
19 applied to leaf samples of American chestnut (*Castanea dentata*), tulip poplar (*Liriodendron*  
20 *tulipifera*), red maple (*Acer rubrum*), and chestnut oak (*Quercus montana*). We observed that  
21 FUSE can extract high quantities of DNA in 9-15 minutes, compared to the 30 minutes required  
22 for conventional DNA extraction. FUSE extracted DNA quantities of  $24.33 \pm 6.51$  ng/mg and  
23  $35.32 \pm 9.21$  ng/mg from American chestnut and red maple, respectively, while conventional  
24 methods yielded  $6.22 \pm 0.87$  ng/mg and  $11.51 \pm 1.95$  ng/mg, respectively. The quality of the  
25 DNA released by FUSE allowed for successful amplification and next-generation sequencing.  
26 These results indicate that FUSE can improve DNA extraction efficiency for leaf tissues.

- 27 Continued development of this technology aims to adapt to field-deployable systems to
- 28 increase the cataloging of genetic biodiversity, particularly in low-resource biodiversity
- 29 hotspots.

## 30 **1. Introduction**

31 Over the past two decades, developments in genome sequencing technologies have enabled  
32 researchers to provide an unprecedented scope and depth of genetic information. Emerging  
33 technologies have equipped researchers with the tools to perform DNA and RNA sequencing in  
34 the field [1], which could allow for new genetics research to be carried out by non-scientists in a  
35 variety of settings that had not previously been feasible [2-4]. Despite technological  
36 advancements, novel sequencing platforms cannot be applied to all sample types, including many  
37 plant species, due to the poor representation of plant genomes in genetic databases. For  
38 example, of the nearly 400,000 unique plant species estimated to exist, only 600 have nearly  
39 complete genome coverage and assembly [5]. A recent review surveying commonly referenced  
40 databases found that only 17.7% of plants had broad genetic coverage, 80% of plant species had  
41 limited data availability, and some had no information other than their taxonomic names  
42 reported [6]. With such little coverage of plant taxa, it is likely that many opportunities for new  
43 uses of undiscovered traits unique to species have gone unnoticed, and with extinction rates  
44 rising, we may lose some of these opportunities forever. Sequencing plant genomes is also  
45 essential for utilizing genetic resources in breeding programs [7], conserving plant species [8, 9],  
46 understanding their role in ecosystem function [6, 10, 11], and phylogenetic studies [12].  
47 Therefore, continued expansion of plant genetic databases is essential to spur discovery, drive  
48 innovation, and protect crucial resources. To accomplish this, tools for more efficient DNA  
49 extraction are necessary. Despite recent advancements in genome sequencing, DNA extraction  
50 technologies have lagged behind, particularly for complex plant tissues where the cell walls and  
51 membranes need to be broken down without significantly degrading the genetic material.

52 Therefore, sample preparation and DNA extraction remain a painful barrier that prevents rapid  
53 and inexpensive sequencing of plant genomes.

54

55 All genetic testing platforms require the input of purified genetic material. Consequently, a  
56 robust DNA extraction protocol that yields DNA of sufficient concentration and purity is essential  
57 for success in subsequent genotyping and sequencing applications. In plants, the release of viable  
58 DNA is hindered by tough tissue matrices that are resistant to mechanical breakdown, the  
59 presence of polysaccharide-rich cell walls, and many inhibitory compounds such as polyphenolic  
60 metabolites [4, 13, 14]. To combat these challenges, manual tissue pulverization with benchtop  
61 tools, such as a mixer mill, or a mortar and pestle under liquid nitrogen, is used in conjunction  
62 with plant cell lysis and purification protocols. Plant DNA extraction is often cumbersome, and  
63 despite specialized tissue breakdown strategies, releasing DNA suitable for genomic analysis is  
64 challenging for many sample types. Additionally, current DNA extraction techniques require an  
65 advanced laboratory [15, 16]. With the rise of point-of-contact genetic testing, the ability to  
66 translate DNA extraction protocols to the field is becoming increasingly important [3, 17]. For  
67 plants, the simplification of DNA extraction could be pivotal in conservation efforts where  
68 researchers must rapidly and inexpensively prepare samples from biodiversity hotspots, which  
69 are often remote and far removed from centralized laboratories [3, 18, 19].

70

71 Our group has recently developed a new technology capable of accelerating and simplifying the  
72 DNA extraction workflow, termed focused ultrasound extraction (FUSE), to address sample  
73 preparation and DNA extraction challenges. FUSE has previously demonstrated its capacity to

74 rapidly release DNA from Atlantic salmon muscle tissue samples with intense cavitation clouds  
75 generated by focused ultrasonic transducers [20]. This technology employs dense acoustic  
76 cavitation bubble clouds similar to those used in histotripsy, a non-invasive focused ultrasound  
77 therapy currently being developed for medical applications [21, 22]. During FUSE, the rapid  
78 expansion and violent collapse of the cavitation microbubbles induce high stress on the target  
79 tissue, which causes mechanical disintegration and results in an acellular tissue lysate [23, 24].  
80 The tissue lysate is then collected, and the released DNA is purified for downstream analyses.  
81 This process differs from conventional extraction methods that require samples to be pulverized  
82 by hand using a mortar and pestle or automated homogenizer under liquid nitrogen and require  
83 elongated incubation periods varying from 10 minutes to 1 hour, depending on the plant tissue,  
84 before DNA collection and purification (Figure 1).

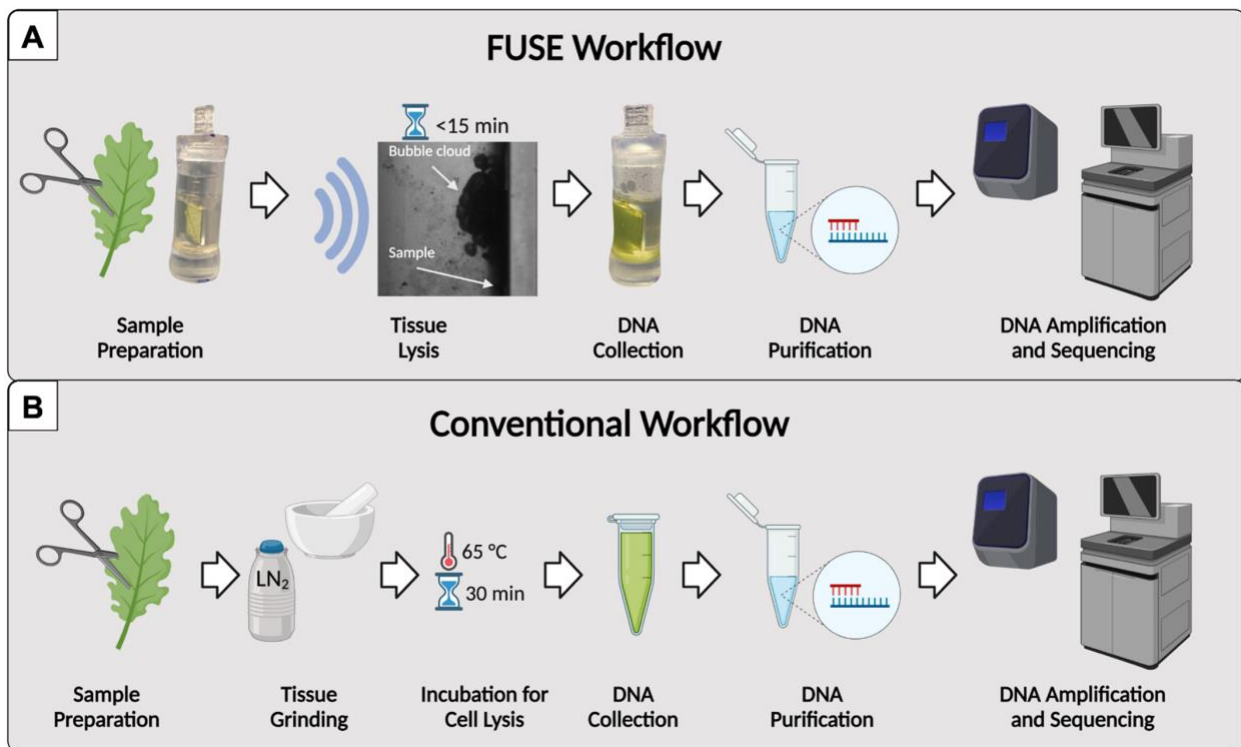

85

86 **Figure 1:** DNA extraction workflow. The process begins with sample preparation for FUSE and conventional DNA  
87 extraction protocols. In both cases, leaf samples are trimmed and massed before tissue processing. For FUSE, the  
88 prepared sample is aligned with the cavitation bubble cloud, and the tissue is sonicated in 15 minutes or less,  
89 eliminating the need for incubation. In both protocols, the DNA is then collected and purified. In the conventional  
90 extraction protocol, tissue processing involves manual grinding under liquid nitrogen and a 30-minute minimum  
91 incubation period. Following purification, the samples are prepared for amplification and sequencing.

92 Here, we test the efficacy of FUSE with plant tissue by 1) determining the feasibility of leaf tissue  
93 breakdown, 2) measuring the DNA yield, 3) amplifying the released DNA with PCR to verify DNA  
94 quality, and 4) sequencing the resultant DNA libraries to validate the utility of FUSE in whole-  
95 genome sequencing applications. While our ultimate goal is to adapt FUSE to low-cost and field-  
96 deployable systems to enable rapid sample processing and DNA extraction from various sample  
97 types, here we address the feasibility of FUSE for DNA release from leaf tissue in a laboratory  
98 setting using prototype transducers and custom acoustically transparent sample holders. We  
99 hypothesize that FUSE can pulverize leaf tissue and yield significant quantities of DNA with a  
100 quality suitable for PCR amplification and next-generation sequencing. If successful, FUSE could  
101 streamline plant DNA extraction workflows to improve standard laboratory practices. Further  
102 technology development could allow the miniaturization of the FUSE system to bring this  
103 technology to the field to expand the scope of opportunities.

104

## 105 **2. Materials and Methods**

106 To demonstrate the ability of FUSE to rapidly provide amplifiable DNA fragments for genetic  
107 analysis, we used frozen leaf samples collected from American chestnut (*C. dentata*), tulip poplar  
108 (*L. tulipifera*), red maple (*A. rubrum*), and chestnut oak (*Q. montana*) trees that were stored at -

109 20 °C before use. These species were selected because they were locally available and  
110 represented a wide range of angiosperm taxonomic diversity that may correspond to variation in  
111 physical properties and secondary metabolite composition. The tissue samples were prepared  
112 and processed under the following experimental conditions:

113

## 114 2.1. FUSE Pulse Generation

115 A custom 32-element 500 kHz array transducer with a geometric focus of 75 mm, an aperture  
116 size of 150 mm, and an effective f-number of 0.58 was used for all experiments in this study  
117 [25]. A custom high-voltage pulser was used to drive the transducer and generate a short single  
118 cycle ultrasound pulse. The pulser was connected to a field-programmable gate array (FPGA)  
119 board (Altera DE0-Nano Terasic Technology, Dover, DE, USA), which was explicitly programmed  
120 for histotripsy therapy pulsing. A custom-built fiber-optic probe hydrophone (FOPH) [26] was  
121 used to measure the acoustic output pressure of the transducers. The FOPH was cross-  
122 calibrated at low-pressure values using a reference hydrophone (Onda HNR-0500) to ensure  
123 accurate pressures were measured from the FOPH. The lateral and axial full width half  
124 maximum (FWHM) dimensions at the geometric focus of the transducer were measured to be  
125 2.3 mm and 7.1 mm, respectively. The acoustic pressures used for all experiments were  
126 measured in degassed water at the focal point of the transducer, which was identified using a  
127 3D beam scan. The acoustic output could not be directly measured at higher pressure levels ( $p$ -  
128  $> 16$  MPa) due to cavitation at the fiber tip. These pressures were estimated by summing the  
129 output focal  $p$ - values from individual transducer elements. For all samples in this study, a  
130 pressure of  $\sim 34$  MPa was applied for FUSE processing.

131

## 132 2.2. Visualization of FUSE Tissue Disintegration

133 For all focused ultrasound experiments, high-speed optical imaging was done using a machine-  
134 vision camera (Blackfly S 3.2MP Mono USB3 Vision, FLIR Integrated Imaging Solutions,  
135 Richmond, BC, Canada) that was aligned with the focal zone of the transducer using a 100 mm  
136 F2.8 Macro lens (Tokina AT-X Pro, Kenko Tokina Co., LTD, Tokyo, Japan) and backlit by a custom-  
137 built pulsed LED strobe light capable of high-speed triggering with 1  $\mu$ s exposures. As done in  
138 previous studies, the camera and the strobe light were triggered individually by the amplifier  
139 box, with the camera shutter opening at the time of pulse generation and the strobe acting as  
140 the shutter [27, 28]. The camera was triggered to capture one image every 50<sup>th</sup> pulse. The  
141 exposures were centered at delay times of 6, 48.5, and 98.5  $\mu$ s after the pulse arrived at the  
142 focus to allow visualization of bubble cloud formation, coalescence, and collapse.

143

## 144 2.3. Sample Preparation

145 Three leaves of American chestnut, tulip poplar, red maple, and chestnut oak were processed  
146 with FUSE and conventional extraction methods. Half of each leaf was used for FUSE, and the  
147 other half was used for conventional extraction (Figure S1). Three samples were acquired from  
148 each half. All samples processed with FUSE were prepared as 12 mm squares using a sterile  
149 scalpel blade. The mass of FUSE samples ranged from 10-30 mg, depending on the thickness of  
150 the sample.

151

### 152 2.3.i. FUSE Experimental Configuration



153 Leaf tissue samples were secured in a custom-designed sample holder positioned in the axial  
154 focus of the transducer, located between the camera and light source. The sample holder was  
155 designed to support a 12.5 mm x 12.5 mm x 1 mm sapphire glass window, the sample, and a  
156 polyethylene terephthalate glycol (PETG) square frame that secured the sample on the surface  
157 of the glass backing. The assembled sample holder was placed inside an optically transparent  
158 and acoustically permeable tube with an inner diameter of 9.525 mm and a wall thickness of  
159 1.59 mm (Tygon PVC E-1000, McMaster-Carr, Douglasville, GA, USA). When the sample holder  
160 was placed in the tube, cylindrical appendages at the top and bottom of the sample holder  
161 created a controlled volume chamber for the DNA lysis buffer. The upper appendage featured  
162 a small circular opening for applying the DNA lysis buffer. A custom-built mount suspended the  
163 tube assembly in the water tank for tissue processing, and a stopper was designed to seal the  
164 other end of the tube. A robotic positioning system controlled by custom MATLAB scripts was  
165 used to align samples with the focus of the ultrasonic transducer (Figure 2).

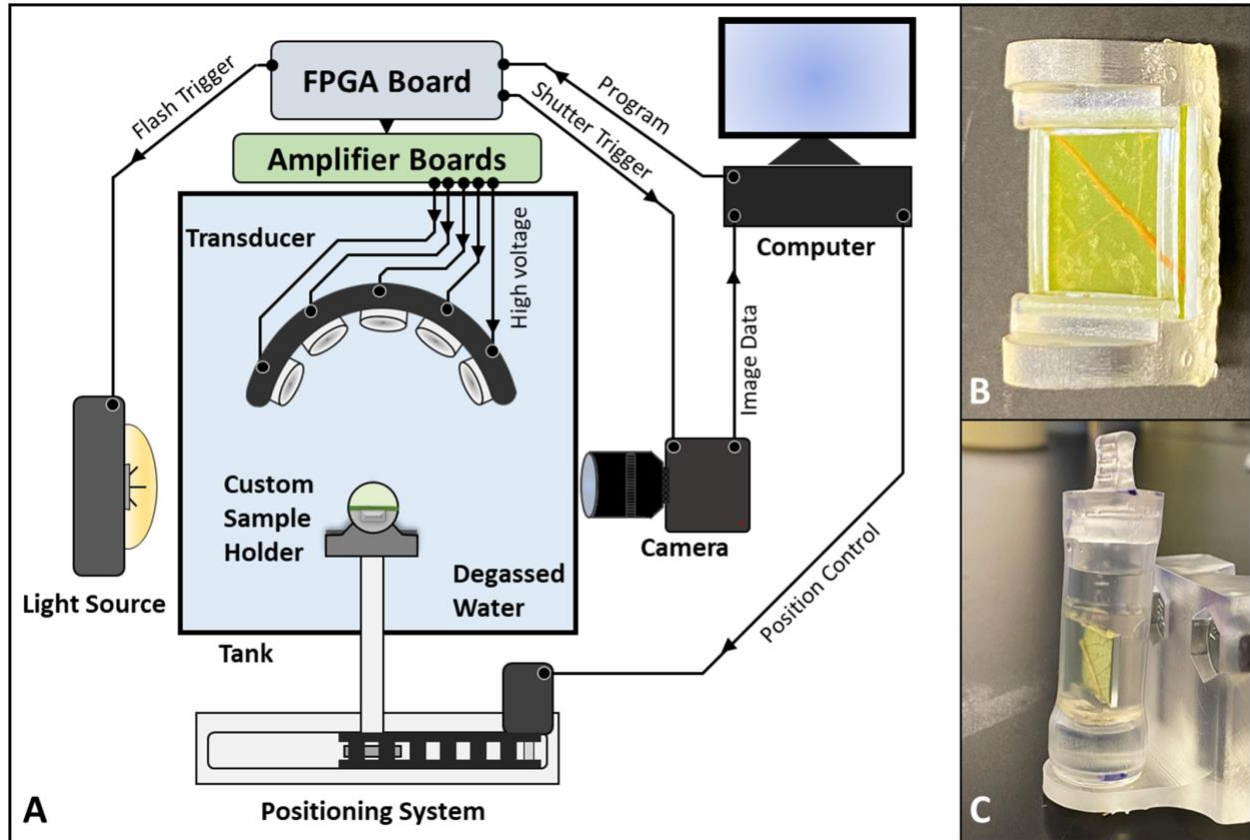

166

167 **Figure 2:** Experimental FUSE set-up. (A) Ultrasonic transducers are driven by an FPGA board and amplifier. High-  
168 speed imaging is performed using a strobe and camera controlled by signals from the FPGA board. Custom scripts  
169 are delivered to the FPGA board, and imaging data is recorded by a computer. A robotic positioning system,  
170 controlled by the computer using MATLAB, is used to align the sample in the focus of the transducer array. (B) A  
171 custom sample holder designed to support a sapphire glass backing, the leaf sample, and a PETG frame is used. (C)  
172 The sample holder assembly is housed in an acoustically permeable tube for DNA extraction experiments.

173 The configuration of the sample and sapphire glass backing in the focus of the transducer was  
174 chosen to maximize the efficiency of tissue sonication with FUSE. When ultrasonic pulses  
175 generate a cavitation bubble cloud near a rigid boundary, high-pressure collapse is expected to  
176 occur toward the surface of the boundary [29-31]. Figure 3 demonstrates this effect. As the time  
177 after pulse arrival increased, microbubble coalescence became more evident, and the

178 concentration of bubbles near the sample surface increased. Sapphire glass was chosen because  
179 it is hydrodynamically strong and has a high acoustic impedance. The hydrodynamic strength of  
180 the sapphire glass provided an unyielding surface to support the sample when exposed to high-  
181 pressure fluid flow caused by cavitation. The high acoustic impedance increased the pressure  
182 near the boundary and induced the cavitation bubbles to grow larger and collapse more violently.  
183 Overall, this effect maximized the impact pressure felt by the sample. In preliminary experiments,  
184 FUSE was tested without including the sapphire glass backing and sample holder. With this  
185 configuration, the sample was free to move outside of the focal zone, which decreased the tissue  
186 disintegration efficiency of FUSE and caused inconsistencies in tissue breakdown success.

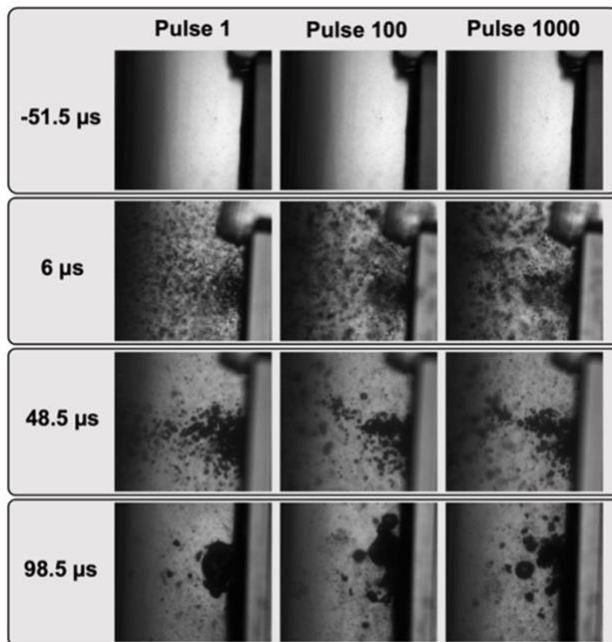

187  
188 **Figure 3:** The cavitation bubble cloud collapses toward the surface of the leaf tissue. 51.5  $\mu\text{s}$  before pulse arrival (row  
189 1), the sample and sapphire glass backing are imaged. 6  $\mu\text{s}$  after pulse arrival (row 2), the cavitation cloud is visible  
190 and contains many microbubbles that have not substantially expanded or coalesced. As time progresses (rows 3), the  
191 microbubbles begin to coalesce and are concentrated near the sample's surface. 98.5  $\mu\text{s}$  after pulse arrival (row 4),  
192 the microbubbles are near collapse and situated adjacent to the sample.

193

194 *2.3.ii. Control Sample Preparation and Tissue Lysis*

195 Control samples were obtained by cutting the leaf tissue into 100 mg segments, and samples  
196 were disrupted by grinding with mortar and pestle under liquid nitrogen. 100 mg control samples  
197 were put in the mortar; liquid nitrogen was added to freeze the samples and cool the mortar,  
198 pestle, and spatula. To begin, grinding with the pestle was done slowly, and once the liquid  
199 nitrogen was mostly evaporated, more vigorous grinding was performed to reduce the tissue to  
200 a fine powder. The tissue powder was then transferred to a 1.5 mL centrifuge tube where 400  $\mu$ L  
201 of 1% PVP-40 Buffer AP1 solution and 4  $\mu$ L of RNase A were added (Qiagen DNeasy Plant Kit  
202 Qiagen Inc, Hilden, Germany). The tube was initially vortexed to homogenize the solution before  
203 incubation at 65 °C for 30 minutes with a short vortex every 5 minutes.

204

205 *2.4 FUSE Tissue Disintegration*

206 Leaf tissue samples were processed using single cycle ultrasound pulses delivered at a pressure  
207 of 34 MPa and a pulse repetition frequency (PRF) of 500 Hz. Measurements made with a fiber  
208 optic hydrophone determined that pressure loss was negligible (<1%) when pulses were  
209 delivered through the sample tube. Before tissue processing, the acoustic focus was directed at  
210 the center of the sample. To completely disintegrate the leaf tissue sample, MATLAB scripts  
211 controlling the positioning system were designed to move the sample in a spiral square pattern  
212 such that each point within the 100 mm<sup>2</sup> disintegration zone was exposed to the focal bubble  
213 cloud for 0.5 s. Using this approach, a single scan of the applied pattern delivered 250 pulses per  
214 point, with multiple scans used for each sample to achieve sufficient tissue breakdown. To

215 account for potential differences in the physical properties of the selected leaf species, the  
216 number of scans required for complete tissue disintegration was initially characterized for  
217 American chestnut, tulip poplar, red maple, and chestnut oak samples (n=3) backed with  
218 sapphire glass suspended in an open water bath. Images of the sample were taken after each  
219 scan. Each image was converted to grayscale, then to binary using the Otsu method [32]. The  
220 targeted tissue area was mapped as an ROI with dimensions of 10 x 10 mm to represent the area  
221 exposed to ultrasonic pulses. The disrupted tissue area inside and outside the ROI was quantified  
222 by counting the number of pixels using custom MATLAB scripts. Pixel counts were converted to  
223 tissue disintegration area. The significance of the area measurements was determined using an  
224 unpaired student's t-test with unequal variance. Values less than 0.05 ( $p < 0.05$ ) were considered  
225 significant.

226

## 227 2.5 Purification Conditions

228 The robustness of the DNA extraction process was investigated through purification of the  
229 disintegrated tissue and quantification of the released DNA. DNA was extracted from samples of  
230 American chestnut, tulip poplar, red maple, and chestnut oak with FUSE (n = 9) and conventional  
231 extraction methods (n = 9) using a lysis buffer and purified using silica columns (Qiagen DNeasy  
232 Plant Kit Qiagen Inc, Hilden, Germany). All lysates were analyzed with a Qubit™ 4 Fluorometer  
233 (ThermoFisher, Waltham, MA, USA) and a Nanodrop™ One (ThermoFisher, Waltham, MA, USA)  
234 to determine the quantity and quality of DNA released with FUSE and control samples. DNA yield  
235 was reported as the quantity of DNA released per milligram of tissue to normalize input sample

236 mass. For data acquired from Nanodrop™ and Qubit™ measurements, an unpaired student's t-  
237 test with unequal variance was used, with values less than 0.05 ( $p < 0.05$ ) considered significant.

238

239 FUSE and control samples were purified with a lysis buffer containing 1% PVP-40 Buffer AP1  
240 solution and RNase A. The lysis buffer used on the FUSE samples consisted of 1 mL of 1% PVP-40  
241 Buffer AP1 solution and 8  $\mu$ L of RNase A (0.8 mg), and samples were soaked for the duration of  
242 FUSE tissue sonication. The lysis buffer volume used for the controls varied depending on the  
243 quality of the leaf tissue sample, which was determined based on the color and age assessment.  
244 For older samples with a dark green or brown-green color, 1 mL of 1% PVP-40 Buffer AP1 solution  
245 and 8  $\mu$ L of RNase A (0.8 mg) were used. For younger samples with a yellow-green color, 500  $\mu$ L  
246 of 1% PVP-40 Buffer AP1 solution and 4  $\mu$ L of RNase A (0.4 mg) were used. This was done because  
247 the leaves with a lower water content yielded a larger sample volume after grinding with mortar  
248 and pestle under liquid nitrogen and therefore required a greater buffer volume for proper cell  
249 lysis. Subsequent purification of FUSE and control samples was performed in silica columns using  
250 the standard protocol as recommended by the manufacturer (Qiagen DNeasy Plant Kit Qiagen  
251 Inc, Hilden, Germany).

252

## 253 2.6 PCR Amplification

254 To compare the two methods for downstream genotyping, American chestnut genomic DNA  
255 extracted by FUSE and conventional methods was subjected to a genotyping by sequencing (GBS)  
256 workflow that involved restriction digestion followed by ligation of sequencing adapters and PCR  
257 amplification [33]. American chestnut samples processed with FUSE and conventional methods

258 were normalized to 55 ng, then digested with 1  $\mu$ L of ApeKI (New England BioLabs, Ipswich, MA,  
259 USA). This restriction enzyme recognizes a 5 bp degenerate sequence GCWGC, where W is an A  
260 or T [34]. For one of the American chestnut samples processed with FUSE, the quantity of eluted  
261 DNA did not reach 55 ng, so 36.2 ng of DNA was used in the digestion reaction. The resulting DNA  
262 fragments were ligated to Illumina-compatible adapters with 1.6  $\mu$ L of T4 DNA ligase. P1 adapters  
263 contained a unique barcode region for each adapter immediately upstream of the ligated DNA  
264 fragment, and the P2 adapter was consistent for all samples. PCR was performed under the  
265 following conditions: 95 °C for 1 minute, followed by 18 cycles of 95 °C for 30 seconds, 63 °C for  
266 20 seconds, and 68 °C for 30 seconds. Lastly, samples were brought to 68 °C for 5 minutes and  
267 kept at 4 °C. PCR primers contained complementary sequences for amplifying restriction  
268 fragments with ligated adapters [34]. Ligation and amplification were assessed by gel  
269 electrophoresis for all samples. Six samples, three processed with FUSE and three processed with  
270 conventional methods, were viewed using a 2100 Bioanalyzer instrument (2100 Bioanalyzer,  
271 Agilent, Santa Clara, CA, USA) to compare the fragment size distribution for individual PCR  
272 products yielded by FUSE and conventional methods. DNA samples were purified before and  
273 after PCR with the Monarch<sup>®</sup> PCR and DNA Clean-Up Kit (New England Biolabs, Ipswich, MA,  
274 USA). Individual sample libraries were pooled, and fragments ranging from 250-550 bp were  
275 selected using BluePippin<sup>™</sup> (Sage Science, Beverly, MA, USA). The resulting library was visualized  
276 using a 2100 Bioanalyzer instrument.

277

278 2.7 Sequencing Analysis

279 The American chestnut GBS libraries were sequenced with the NovaSeq 6000 instrument  
280 (Illumina, San Diego, CA, USA) in 2x150 bp paired-end mode at Duke University Center for  
281 Genomic and Computational Biology. Raw reads were filtered for quality and adapter  
282 contamination, then demultiplexed using STACKS software [35]. Filtered reads were aligned to  
283 v.1.1 of the *C. dentata* reference genome [36] using the Burrows-Wheeler Aligner (BWA) mem  
284 algorithm and subsequently converted to BAM format with SAMtools [33]. Heterozygous sites  
285 were called with the Genome Analysis Toolkit (GATK) HaplotypeCaller algorithm [37, 38], and  
286 these GVCFs were then merged using the GenotypeGVCFs function. Variants were flagged and  
287 removed as low quality if they had the following characteristics: low map quality (MQ < 40); high  
288 strand bias (FS > 40); differential map quality between reads supporting the reference and  
289 alternative alleles (MQRankSum < -12.5); bias between the reference and alternate alleles in the  
290 position of alleles within the reads (ReadPosRankSum < -8.0); and low depth of coverage (DP <  
291 5). Coverage depth per sample was calculated using the SAMtools depth function. Statistical  
292 analysis of coverage depth was performed using a Wilcoxon rank-sum test with values less than  
293 0.05 ( $p < 0.05$ ) considered significant.

294

### 295 **3. Results & Discussion**

#### 296 **3.1 FUSE Tissue Disintegration**

297 The feasibility of FUSE for leaf tissue disintegration was examined with American chestnut, tulip  
298 poplar, red maple, and chestnut oak leaves by characterizing tissue breakdown after each FUSE  
299 scan. Images were captured after each scan to demonstrate the progression of tissue  
300 disintegration for each species (Figure 4). In all cases, the damaged tissue area increased with



301 increasing scan number, but the number of scans required to achieve significant tissue  
302 breakdown differed among species. Tulip poplar leaves were the most vulnerable to breakdown,  
303 as they were the only species with notable tissue disintegration after one scan. The extent of  
304 tulip poplar tissue disruption increased with each scan. For the American chestnut and red maple  
305 samples, scans one and two generated minimal tissue breakdown, but after scan three, the area  
306 of tissue breakdown was more observable. For American chestnut, the tissue in the targeted  
307 region was completely disrupted after four scans. For red maple, the tissue breakdown continued  
308 to increase after scans four, five, and six. For American chestnut, tulip poplar, and red maple  
309 samples, tissue breakdown beyond the bounds of the targeted disintegration zone was observed.  
310 This effect was likely due to dispersed cavitation occurring outside the focal point of the  
311 converging pressure fronts. Surface inhomogeneities at solid-liquid interfaces result in the  
312 growth of cavitation nuclei that can induce cavitation at thresholds below the intrinsic threshold  
313 [39, 40]. Previous work has also shown that leaves are more susceptible to cavitation-induced  
314 tissue disruption when gas channels are present in the tissue [41, 42]. Therefore, it is possible  
315 that the surface architecture and distribution of gas channels within the tissue matrices created  
316 cavitation nucleation sites outside the targeted area. It is also possible that residual gas bubbles  
317 from preceding pulses diffused outside the focus and served as cavitation nuclei. This would  
318 induce cavitation below the intrinsic pressure threshold and expose a larger area of the leaves to  
319 cavitation [43]. Lastly, off-target leaf tissue disintegration could result from acoustic shielding,  
320 such that the residual bubbles in the acoustic focus increased the likelihood of acoustic scattering  
321 [44, 45]. The trends in tissue breakdown for chestnut oak differed from the other three species.  
322 Visible tissue breakdown was not observed until after the third scan, and tissue disintegration in

323 the following scans did not progress as promptly as it did for the American chestnut, tulip poplar,  
324 and red maple samples. It is expected that variation in tissue breakdown across species was due  
325 to differences in physical properties, such as the water content and tissue strength.

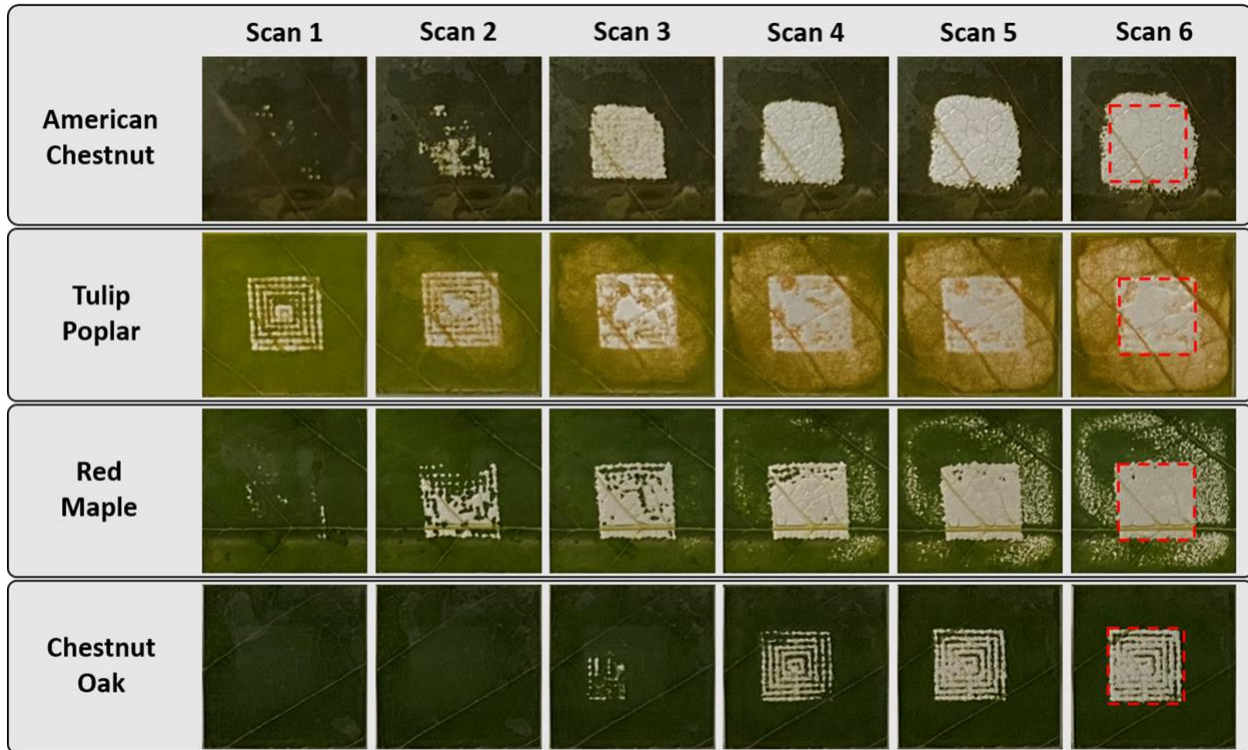

326

327 *Figure 4: Leaf tissue disintegration increases after each FUSE scan. The red square in the top right identifies the*  
328 *targeted tissue region. Tissue breakdown beyond the target area is the result of peripheral cavitation damage. Image*  
329 *data suggests that the leaf species affect FUSE tissue disintegration efficiency.*

330 The observed efficiency of FUSE tissue disintegration was assessed quantitatively by plotting the  
331 disintegration area inside the targeted region and the total disintegration area as a function of  
332 scan number for American chestnut, tulip poplar, red maple, and chestnut oak leaves (Figure 5).  
333 The initial breakdown occurred the most rapidly in tulip poplar leaves, as after scan one,  $38.4 \pm$   
334  $11.4\%$  of the targeted tissue region was disintegrated. In comparison,  $<10\%$  of target tissue was  
335 disintegrated after scan one for American chestnut, red maple, and chestnut oak. The targeted

336 tulip poplar tissue region was significantly processed after two scans ( $p < 0.05$  compared to zero  
337 scans), and  $>90\%$  of the targeted area was processed after four scans. After six scans, a final  
338 disintegration area of  $97.4 \pm 0.34\%$  was observed within the targeted region. The initial  
339 breakdown of American chestnut leaves did not occur as rapidly as tulip poplar, but American  
340 chestnut quickly approached complete tissue breakdown, reaching  $>90\%$  of tissue breakdown  
341 inside the targeted area after three scans. American chestnut leaves were significantly processed  
342 after three scans ( $p < 0.05$  compared to zero scans), and six scans resulted in a disintegration area  
343 of  $99.3 \pm 0.75\%$  inside the targeted region. Red maple leaves were more resistant to breakdown  
344 than tulip poplar and American chestnut, as four scans were required to achieve significant  
345 breakdown ( $p < 0.05$  compared to zero scans). Interestingly, the degree of breakdown for red  
346 maple in the targeted region never surpassed  $90\%$ . After six scans, the final disintegration area  
347 within the targeted region for red maple was  $89.2 \pm 6.0\%$ . The observed reduction in tissue  
348 breakdown efficiency could be due to the presence of the midrib, the central vein of the leaf.  
349 Previous work investigating the effects of ultrasonic cavitation on *Elodea* leaves found that when  
350 ultrasound was targeted at the midrib, there was a lack of cell disruption [42]. Although tulip  
351 poplar, American chestnut, and red maple samples achieved significant breakdown in less than  
352 six scans, increasing the scan number decreased the margin of error in the disintegration area.  
353 Therefore, six scans were used to process American chestnut, tulip poplar, and red maple  
354 samples to allow more consistent comparisons. Six scans resulted in a 9-minute tissue processing  
355 time and a total of 1,500 pulses per point. Chestnut oak was the most resistant to breakdown.  
356 After scan six, only  $56.0 \pm 22.9\%$  of the targeted area was processed, so up to ten scans were  
357 applied to chestnut oak leaves. Chestnut oak samples required eight scans to achieve a significant

358 breakdown of  $76.6 \pm 13.8\%$  ( $p < 0.05$  compared to zero scans). Since increasing the scan number  
359 increased the area of disintegration and reduced the margin of error in the disintegration area,  
360 ten scans were used for chestnut oak tissue processing. Ten scans resulted in a 15-minute tissue  
361 processing time and 2,500 pulses per point. The final disintegration area within the targeted  
362 region for chestnut oak was  $83.7 \pm 10.6\%$ .

363

364 Leaf tissue breakdown outside of the targeted area was also quantified to examine the effects of  
365 dispersed cavitation. Trends in tissue breakdown outside of the targeted area were comparable  
366 to those observed within the targeted area, such that the tissue disintegration area increased  
367 with increasing scan number. Additionally, the extent of American chestnut, tulip poplar, and red  
368 maple tissue disintegration outside the targeted region was greater than chestnut oak. These  
369 results suggest that differences in the physical properties among leaf species also affect the  
370 extent of collateral tissue breakdown. However, collateral tissue breakdown is not of central  
371 importance for this study because the samples are restricted to the size of the targeted region in  
372 DNA extraction experiments.

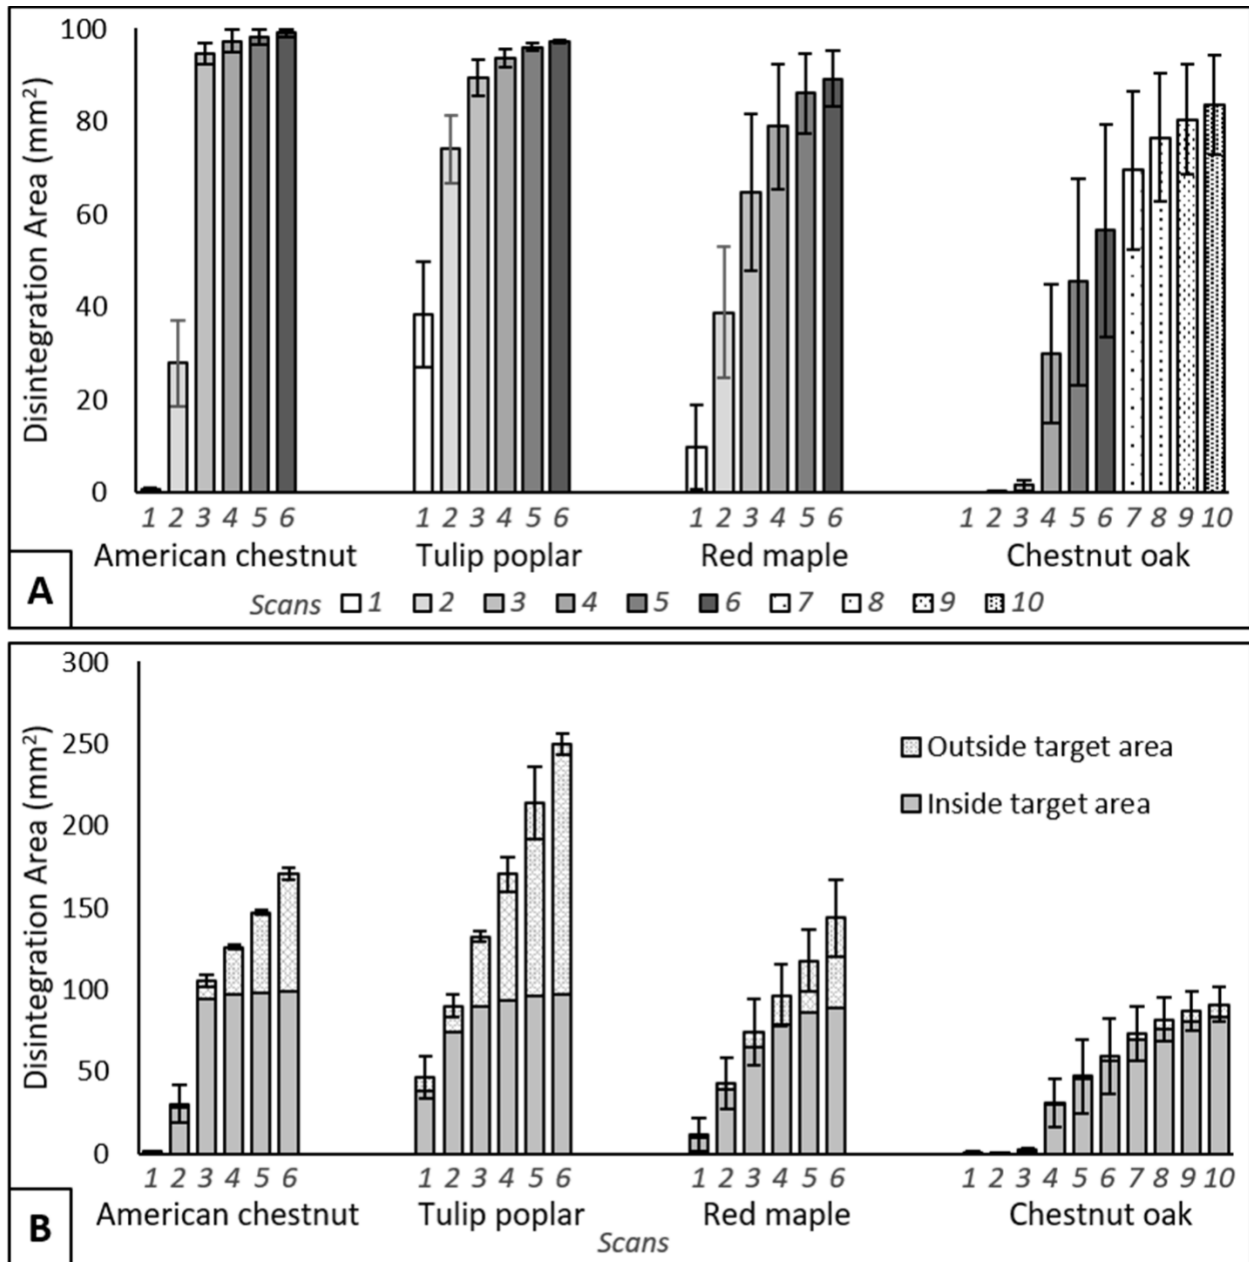

373

374 *Figure 5: The leaf tissue disintegration area increases inside and outside the target area with the number of FUSE*

375 *scans. (A) The disintegration area within the target area increases after each scan for all species. (B) The total*

376 *disintegration area shows that tissue outside of the target area is also disintegrated by FUSE. Six scans are used for*

377 *processing American chestnut, tulip poplar, and red maple samples. Chestnut oak samples required ten scans for*

378 *processing due to a reduction in disintegration efficiency.*

379

### 380 3.2 DNA Extraction Feasibility

381 The determined number of FUSE scans required to disintegrate each leaf species was applied to  
382 the DNA extraction workflow to characterize the quantity of DNA released by FUSE compared to  
383 conventional methods, the control protocol in this study (Figure 6). Overall, FUSE was able to  
384 release greater quantities of DNA than conventional extraction methods in a fraction of the  
385 processing time. Notably, FUSE increased the DNA yield with less than half of the input sample  
386 mass required by the conventional protocol. The quantity of DNA released with FUSE and controls  
387 varied with species. The DNA yield provided by six FUSE scans was significantly greater than  
388 controls for American chestnut and red maple samples. Six FUSE scans released  $24.3 \pm 6.5$  ng/mg  
389 from American chestnut and  $35.3 \pm 9.3$  ng/mg from red maple samples, while controls yielded  
390  $6.2 \pm 0.87$  ng/mg and  $11.5 \pm 1.9$  ng/mg, respectively. No significant differences were observed in  
391 the quantity of DNA released from tulip poplar samples between six FUSE scans,  $32.6 \pm 7.8$   
392 ng/mg, and controls,  $28.4 \pm 1.8$  ng/mg. For chestnut oak leaves,  $37.9 \pm 5.9$  ng/mg of DNA was  
393 provided by ten FUSE scans,  $10.7 \pm 1.7$  ng/mg from six FUSE scans, and  $17.2 \pm 2.0$  ng/mg from  
394 controls. The DNA yield provided by ten FUSE scans was significantly greater than six FUSE scans  
395 and controls for chestnut oak samples, showing that the capacity of FUSE to release DNA from  
396 tough tissues improves with an increased number of processing scans.

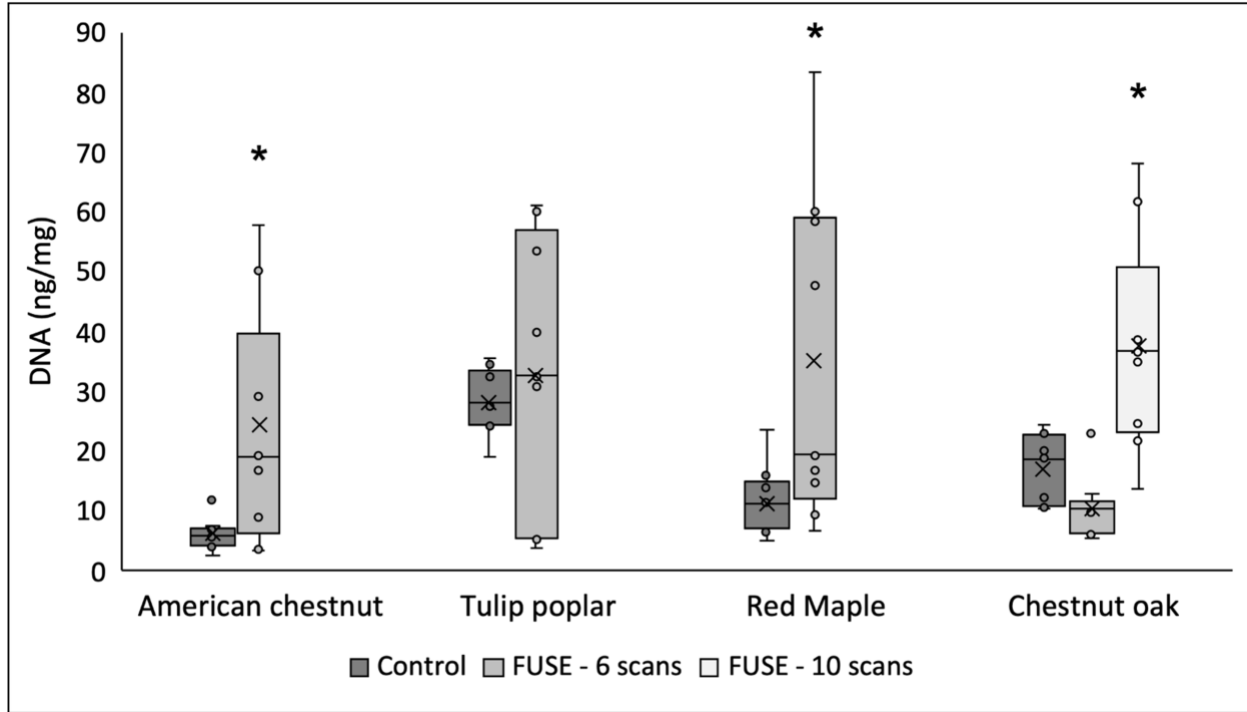

397

398 *Figure 6: DNA extraction results show that FUSE releases DNA from leaf tissue. A significant increase in DNA release*  
 399 *from American chestnut and red maple samples is observed when processed with 6 FUSE scans compared to controls.*  
 400 *DNA release from chestnut oak samples is significantly higher when 10 FUSE scans are used for processing than*  
 401 *controls. After 6 FUSE scans, DNA release from tulip poplar samples is comparable to controls. \*Indicate significant*  
 402 *( $p < 0.05$ ) differences between FUSE and control samples.*

403 *Table 1: American chestnut tissue breakdown after FUSE processing demonstrates that greater tissue disintegration*  
 404 *increases the concentration of DNA release. DNA quantification measurements are reported from Qubit™*  
 405 *Fluorometer measurements, and 260/280 and 260/230 ratios are reported from Nanodrop™ measurements.*

| Leaf Species             | Description              | Data        | Sample 1                                                                             | Sample 2                                                                              | Sample 3                                                                              |
|--------------------------|--------------------------|-------------|--------------------------------------------------------------------------------------|---------------------------------------------------------------------------------------|---------------------------------------------------------------------------------------|
| American Chestnut Leaf 1 | Large, thick, dark green | 6 scans     |  |  |  |
|                          |                          | DNA (ng/mg) | 29.48                                                                                | 29.32                                                                                 | 50.14                                                                                 |
|                          |                          | 260/280     | 1.75                                                                                 | 1.66                                                                                  | 1.72                                                                                  |
|                          |                          | 260/230     | 2.16                                                                                 | 1.72                                                                                  | 2.01                                                                                  |

|                          |                         |             |                                                                                    |                                                                                     |                                                                                     |
|--------------------------|-------------------------|-------------|------------------------------------------------------------------------------------|-------------------------------------------------------------------------------------|-------------------------------------------------------------------------------------|
| American Chestnut Leaf 2 | Large, dry, brown green | 6 scans     |  |  |  |
|                          |                         | DNA (ng/mg) | 16.68                                                                              | 19.30                                                                               | 58.11                                                                               |
|                          |                         | 260/280     | 3.43                                                                               | 4.27                                                                                | 2.04                                                                                |
|                          |                         | 260/230     | 26.65                                                                              | -4.40                                                                               | 1.72                                                                                |
| American Chestnut Leaf 3 | Large, dry, brown green | 6 scans     |  |  |  |
|                          |                         | DNA (ng/mg) | 3.31                                                                               | 3.65                                                                                | 8.95                                                                                |
|                          |                         | 260/280     | 2.60                                                                               | 1.64                                                                                | 1.91                                                                                |
|                          |                         | 260/230     | -0.94                                                                              | -2.22                                                                               | -5.77                                                                               |

406

407 **Table 2:** *Tulip poplar tissue breakdown after FUSE processing demonstrates that greater tissue disintegration*  
 408 *increases the concentration of DNA release. DNA quantification measurements are reported from Qubit™*  
 409 *Fluorometer measurements, and 260/280 and 260/230 ratios are reported from Nanodrop™ measurements.*

| Leaf Species        | Description              | Data        | Sample 1                                                                             | Sample 2                                                                              | Sample 3                                                                              |
|---------------------|--------------------------|-------------|--------------------------------------------------------------------------------------|---------------------------------------------------------------------------------------|---------------------------------------------------------------------------------------|
| Tulip Poplar Leaf 1 | Large, thick, dark green | 6 scans     | 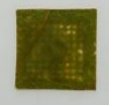 |  |  |
|                     |                          | DNA (ng/mg) | 5.25                                                                                 | 30.89                                                                                 | 5.65                                                                                  |
|                     |                          | 260/280     | 1.53                                                                                 | 1.82                                                                                  | 1.60                                                                                  |
|                     |                          | 260/230     | 2.59                                                                                 | 2.12                                                                                  | 1.16                                                                                  |
| Tulip Poplar Leaf 2 | Small, wet, yellow green | 6 scans     |  |  |  |
|                     |                          | DNA (ng/mg) | 53.64                                                                                | 60.28                                                                                 | 61.32                                                                                 |
|                     |                          | 260/280     | 1.83                                                                                 | 1.85                                                                                  | 1.75                                                                                  |
|                     |                          | 260/230     | 1.50                                                                                 | 1.88                                                                                  | 1.69                                                                                  |
| Tulip Poplar Leaf 3 | Small, wet, yellow green | 6 scans     |  |  |  |
|                     |                          | DNA (ng/mg) | 3.71                                                                                 | 32.70                                                                                 | 40.06                                                                                 |
|                     |                          | 260/280     | 2.09                                                                                 | 1.70                                                                                  | 1.72                                                                                  |
|                     |                          | 260/230     | -1.06                                                                                | 1.23                                                                                  | 1.58                                                                                  |

410



411 **Table 3:** Red maple tissue breakdown after FUSE processing demonstrates that greater tissue disintegration increases  
 412 the concentration of DNA release. DNA quantification measurements are reported from Qubit™ Fluorometer  
 413 measurements, and 260/280 and 260/230 ratios are reported from Nanodrop™ measurements.

| Leaf Species     | Description              | Data        | Sample 1                                                                            | Sample 2                                                                             | Sample 3                                                                             |
|------------------|--------------------------|-------------|-------------------------------------------------------------------------------------|--------------------------------------------------------------------------------------|--------------------------------------------------------------------------------------|
| Red Maple Leaf 1 | Large, thick, dark green | 6 scans     |   |   |   |
|                  |                          | DNA (ng/mg) | 47.84                                                                               | 60.12                                                                                | 19.48                                                                                |
|                  |                          | 260/280     | 1.66                                                                                | 1.68                                                                                 | 1.48                                                                                 |
|                  |                          | 260/230     | 1.73                                                                                | 1.89                                                                                 | 1.15                                                                                 |
| Red Maple Leaf 2 | Small, thick, dark green | 6 scans     |   |   |   |
|                  |                          | DNA (ng/mg) | 58.61                                                                               | 16.85                                                                                | 83.51                                                                                |
|                  |                          | 260/280     | 1.80                                                                                | 1.55                                                                                 | 1.77                                                                                 |
|                  |                          | 260/230     | 2.09                                                                                | 1.59                                                                                 | 1.94                                                                                 |
| Red Maple Leaf 3 | Small, thick, dark green | 6 scans     |  |  |  |
|                  |                          | DNA (ng/mg) | 9.55                                                                                | 14.98                                                                                | 6.96                                                                                 |
|                  |                          | 260/280     | 1.66                                                                                | 1.46                                                                                 | 1.65                                                                                 |
|                  |                          | 260/230     | -1.14                                                                               | 2.43                                                                                 | 5.86                                                                                 |

414

415 **Table 4:** Chestnut oak tissue breakdown after FUSE processing demonstrates that greater tissue disintegration  
 416 increases the concentration of DNA release. DNA quantification measurements are reported from Qubit™  
 417 Fluorometer measurements, and 260/280 and 260/230 ratios are reported from Nanodrop™ measurements.

| Leaf Species        | Description              | Data        | Sample 1                                                                             | Sample 2                                                                              | Sample 3                                                                              |
|---------------------|--------------------------|-------------|--------------------------------------------------------------------------------------|---------------------------------------------------------------------------------------|---------------------------------------------------------------------------------------|
| Chestnut Oak Leaf 1 | Large, thick, dark green | 6 scans     |  |  |  |
|                     |                          | DNA (ng/mg) | 10.37                                                                                | 12.90                                                                                 | 10.92                                                                                 |
|                     |                          | 260/280     | 1.60                                                                                 | 1.69                                                                                  | 1.64                                                                                  |
|                     |                          | 260/230     | 3.63                                                                                 | 2.79                                                                                  | 5.13                                                                                  |
|                     |                          | 10 scans    |  |  |  |

|                        |                             |             |                                                                                      |                                                                                       |                                                                                       |
|------------------------|-----------------------------|-------------|--------------------------------------------------------------------------------------|---------------------------------------------------------------------------------------|---------------------------------------------------------------------------------------|
|                        |                             | DNA (ng/mg) | 24.55                                                                                | 21.78                                                                                 | 13.69                                                                                 |
|                        |                             | 260/280     | 1.66                                                                                 | 1.68                                                                                  | 1.62                                                                                  |
|                        |                             | 260/230     | 1.74                                                                                 | 1.86                                                                                  | 1.79                                                                                  |
| Chestnut Oak<br>Leaf 2 | Large, thick,<br>dark green | 6 scans     | 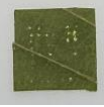   |    |    |
|                        |                             | DNA (ng/mg) | 6.46                                                                                 | 10.51                                                                                 | 6.23                                                                                  |
|                        |                             | 260/280     | 2.67                                                                                 | 1.84                                                                                  | 1.90                                                                                  |
|                        |                             | 260/230     | 6.41                                                                                 | -21.12                                                                                | 9.13                                                                                  |
|                        |                             | 10 scans    |    |    |    |
|                        |                             | DNA (ng/mg) | 39.91                                                                                | 35.08                                                                                 | 61.87                                                                                 |
|                        |                             | 260/280     | 1.86                                                                                 | 1.87                                                                                  | 1.89                                                                                  |
|                        |                             | 260/230     | 2.18                                                                                 | 2.01                                                                                  | 2.07                                                                                  |
| Chestnut Oak<br>Leaf 3 | Large, thick,<br>dark green | 6 scans     |    |    |    |
|                        |                             | DNA (ng/mg) | 5.69                                                                                 | 22.90                                                                                 | 9.90                                                                                  |
|                        |                             | 260/280     | 1.69                                                                                 | 1.77                                                                                  | 1.75                                                                                  |
|                        |                             | 260/230     | -2.97                                                                                | 2.46                                                                                  | -3.94                                                                                 |
|                        |                             | 10 scans    |  |  |  |
|                        |                             | DNA (ng/mg) | 68.18                                                                                | 38.81                                                                                 | 36.83                                                                                 |
|                        |                             | 260/280     | 1.78                                                                                 | 1.77                                                                                  | 1.74                                                                                  |
|                        |                             | 260/230     | 2.36                                                                                 | 3.08                                                                                  | 3.42                                                                                  |

418

419 The DNA extraction results show that leaf species influenced the DNA yield. Since the leaves  
 420 chosen represented a range of angiosperm taxonomic diversity, it was expected that differences  
 421 in physical and chemical properties would affect the quantity of DNA released. The control DNA  
 422 concentration data was examined to determine the effect of species on DNA release. The  
 423 American chestnut DNA yield was significantly lower than the average DNA yield from the control  
 424 samples. The tulip poplar DNA yield was significantly greater than the average DNA yield from  
 425 the control samples. The American chestnut leaves were the only samples described as brown-

426 green, while the tulip poplar leaves were the only samples characterized as yellow-green. These  
427 sample characteristics suggest that the American chestnut samples were more mature than the  
428 tulip poplar samples at the time of collection [46]. It is common for older leaves to have greater  
429 amounts of secondary metabolites, which often cause low yield and poor quality DNA [14].  
430 Therefore, it is likely that the age of the sampled leaves influenced inconsistencies in the quantity  
431 of the released DNA. As mentioned previously, it is also plausible that species-specific differences  
432 influenced the DNA yield. Further investigation into the physical and chemical properties of each  
433 leaf species would be needed to confirm this possibility.

434

435 The 260/280 and 260/230 ratios were measured to assess the quality of the DNA extracted with  
436 FUSE and conventional methods (Table 5). For American chestnut and chestnut oak, the 260/280  
437 ratio was significantly higher for samples processed with six FUSE scans than for control samples.  
438 The 260/280 ratio for six FUSE scans was significantly lower than conventional methods for red  
439 maple leaves. No discernible trends were observed in 260/230 ratios, with values in expected  
440 norms for leaf tissue. However, the 260/30 ratio was significantly higher after ten FUSE scans  
441 than controls for chestnut oak leaves. This significant difference is likely the result of increased  
442 DNA release due to increased tissue breakdown. Some species processed with FUSE showed high  
443 standard error in 260/230 ratios. This result is likely due to incomplete tissue disintegration for  
444 some samples within these groups. However, it may also suggest that DNA extraction with FUSE  
445 affects the breakdown of compounds that contribute to turbidity in a purified sample.

446 **Table 5:** *The quality of DNA released by FUSE is comparable to DNA released by conventional methods. FUSE requires*  
447 *less processing time than conventional methods and releases greater quantities of DNA. DNA quantification*

448 *measurements are reported from Qubit™ Fluorometer measurements, and 260/280 and 260/230 ratios are reported*  
449 *from Nanodrop™ measurements.*

| Sample Type              | FUSE         |              |             |             | Conventional Method |              |             |             |
|--------------------------|--------------|--------------|-------------|-------------|---------------------|--------------|-------------|-------------|
|                          | Time (mm:ss) | DNA (ng/mg)  | 260/280     | 260/230     | Time (mm:ss)        | DNA (ng/mg)  | 260/280     | 260/230     |
| American chestnut        | 9:00         | 24.33 ± 6.51 | 2.34 ± 0.31 | 2.68 ± 3.51 | 30:00               | 6.22 ± 0.87  | 1.45 ± 0.01 | 0.52 ± 0.01 |
| Tulip poplar             | 9:00         | 32.61 ± 7.82 | 1.77 ± 0.05 | 1.41 ± 0.34 | 30:00               | 28.37 ± 1.78 | 1.83 ± 0.01 | 1.99 ± 0.06 |
| Red maple                | 9:00         | 35.32 ± 9.21 | 1.63 ± 0.04 | 1.95 ± 0.60 | 30:00               | 11.51 ± 1.95 | 1.85 ± 0.02 | 2.53 ± 0.19 |
| Chestnut oak<br>6 scans  | 9:00         | 10.65 ± 1.74 | 1.84 ± 0.11 | 0.17 ± 3.00 | 30:00               | 17.17 ± 1.98 | 1.52 ± 0.01 | 0.66 ± 0.02 |
| Chestnut oak<br>10 scans | 15:00        | 37.85 ± 5.93 | 1.76 ± 0.03 | 2.28 ± 0.20 | 30:00               | 17.17 ± 1.98 | 1.52 ± 0.01 | 0.66 ± 0.02 |

450  
451 The FUSE protocol used in this work involves a non-thermal tissue lysis process that has been  
452 shown to reduce the time required for DNA release. The acoustic parameters used in this study,  
453 particularly the PRF of 500 Hz, were chosen for this initial feasibility study based on preliminary  
454 tissue breakdown experiments. In previous work, Atlantic salmon muscle tissue was processed  
455 with FUSE using 10,000 pulses delivered at 25 Hz, which resulted in a total processing time of 6  
456 minutes and 40 seconds [20]. In this study, 270,000 pulses were applied at 500 Hz to complete 6  
457 FUSE scans, and 450,000 pulses were applied at 500 Hz to complete 10 FUSE scans, resulting in  
458 total processing times of 9 and 15 minutes. At higher PRFs, the time efficiency of FUSE was  
459 improved without inducing thermal effects. However, further increasing the PRF is likely to result  
460 in cavitation shielding effects that lower the effectiveness of each pulse [44, 45]. Future work will  
461 be necessary to explore the optimal pulsing parameters for the implementation of higher PRFs.  
462 We expect that implementing FUSE at higher PRFs will expand the applicability of FUSE to more  
463 robust tissue types and significantly decrease the tissue processing time.

464

### 465 3.3 DNA amplification

466 American chestnut samples were selected for amplification and sequencing. All FUSE and control  
467 samples were amplified with PCR following restriction digestion and adaptor ligation. The  
468 samples processed with FUSE and conventional methods amplified successfully, demonstrating  
469 that FUSE yielded high-quality DNA from leaf tissue suitable for PCR amplification. A subset of  
470 the amplified American chestnut libraries was visualized on a 2100 Bioanalyzer to examine the  
471 distribution of DNA fragment sizes for samples processed with FUSE and conventional methods  
472 (Figure 7). Most fragments for both the FUSE and control samples were within the expected range  
473 of 200-600 bp (Figure S2), suggesting that FUSE does not cause greater DNA fragmentation than  
474 conventional extraction methods.

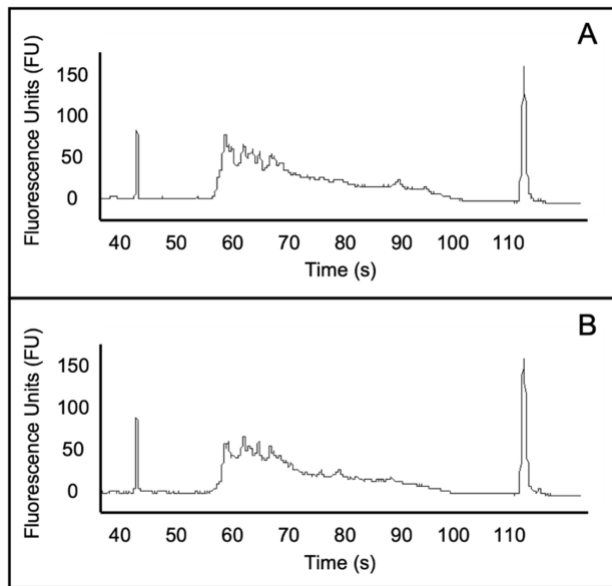

475

476 **Figure 7:** The distribution of DNA fragment sizes for an American chestnut sample processed with conventional  
477 methods (A) is comparable to the DNA fragment size distribution for a sample processed with FUSE (B). This result  
478 confirms that the integrity of DNA provided by FUSE is suitable for PCR amplification.

479

### 480 3.4 Sequencing

481 All American chestnut samples processed with FUSE and conventional methods provided high-  
482 quality next-generation sequencing reads (Accession Number: PRJNA837224). Because  
483 downstream applications of this technology are expected to be focused on identifying genetic  
484 variants from sequence data for population genetics and systematics, we estimated read depth  
485 for variable sites, which showed that FUSE samples had a depth comparable to controls. Read  
486 depth was moderately correlated between the two extraction methods (Figure S3), and mean  
487 depth was not significantly different (25.7 for FUSE and 27.1 for controls;  $P=0.155$  based on a  
488 Wilcoxon rank-sum test). Among individual FUSE and control samples, read depth was fairly  
489 consistent for those processed with FUSE and conventional methods, suggesting that the FUSE  
490 protocol yields DNA with quality comparable to conventional methods, and the DNA is suitable  
491 for NGS analyses (Figure 8).

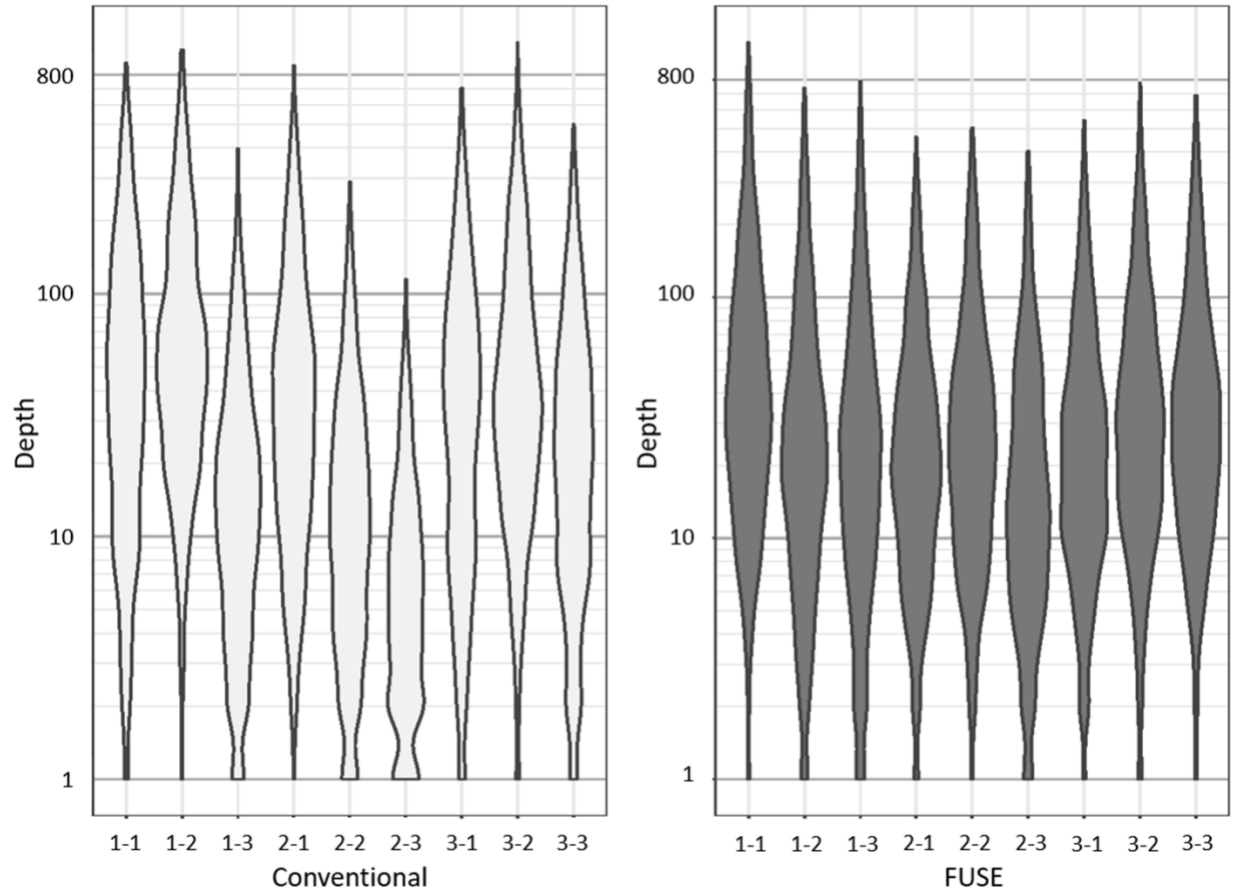

492

493 **Figure 8:** FUSE provides DNA suitable for next-generation sequencing. The uniformity of read depth across  
494 conventional and FUSE samples is comparable. The x-axis labeling represents the leaf and sample number, such that  
495 1-2 identifies the read depth for leaf 1, sample 2.

496

#### 497 **4. Conclusion**

498 This study assessed the efficacy of our recently developed FUSE protocol in plant tissues by  
499 testing samples from American chestnut, tulip poplar, red maple, and chestnut oak leaves. The  
500 success of the FUSE protocol was determined by visualizing the extent of tissue breakdown  
501 observed after FUSE sonication, measuring the quantity and quality of the released DNA, and  
502 evaluating the suitability of DNA extracts for genetic analyses. PCR amplification and NGS were

503 done to assess the utility of the released DNA in genomic workflows. In accordance with previous  
504 work that established the effectiveness of FUSE for releasing DNA from Atlantic salmon muscle  
505 tissue [20], the results of this study demonstrate that FUSE can provide high quantities of DNA  
506 suitable for amplification and sequencing in less time than conventional plant extraction  
507 methods. Additionally, these results suggest that the input sample mass required by FUSE is less  
508 than what is necessary for conventional extraction methods, which could be advantageous in  
509 future work that aims to develop field-deployable FUSE systems for conservation efforts. Overall,  
510 this study shows that the applications of FUSE can be extended to plant tissue, a robust tissue  
511 that is more resistant to mechanical breakdown and has a chemical composition that has  
512 traditionally made DNA accessibility more challenging [4, 13, 14]. In conjunction with previous  
513 findings [20], these results suggest that FUSE could be used as a novel platform for DNA  
514 extraction capable of accelerating workflows for a variety of sample types.

515

## 516 **Acknowledgments**

517 This work was funded by a grant from the Gordon and Betty Moore Foundation (Grant #8518).  
518 We would like to specifically thank Dr. Sara Bender and the Moore Foundation's Science Program  
519 for their ongoing support of this project. Finally, we would like to thank Conservation X Labs, the  
520 National Geographic Society, the Virginia Tech Department of Biomedical Engineering and  
521 Mechanics, and the Virginia Tech Institute for Critical Technology and Applied Science for their  
522 support of this work.

523

## 524 **Data Accessibility Statement**



525 All genetic sequences generated in this work are available on Genbank. Next-generation  
526 sequencing data can be accessed with the Accession number: PRJNA837224.

527

## 528 **1. References**

529 [1] Jain, M., Olsen, H.E., Paten, B. & Akeson, M. 2016 The Oxford Nanopore MinION: delivery of  
530 nanopore sequencing to the genomics community. *Genome biology* **17**, 1-11.

531 [2] Niemz, A., Ferguson, T.M. & Boyle, D.S. 2011 Point-of-care nucleic acid testing for infectious  
532 diseases. *Trends in biotechnology* **29**, 240-250.

533 [3] Dormontt, E.E., Boner, M., Braun, B., Breulmann, G., Degen, B., Espinoza, E., Gardner, S.,  
534 Guillery, P., Hermanson, J.C. & Koch, G. 2015 Forensic timber identification: It's time to  
535 integrate disciplines to combat illegal logging. *Biological Conservation* **191**, 790-798.

536 [4] Rachmayanti, Y., Leinemann, L., Gailing, O. & Finkeldey, R. 2009 DNA from processed and  
537 unprocessed wood: factors influencing the isolation success. *Forensic Science International:  
538 Genetics* **3**, 185-192.

539 [5] Kersey, P.J. 2019 Plant genome sequences: past, present, future. *Current opinion in plant  
540 biology* **48**, 1-8.

541 [6] Cornwell, W.K., Pearse, W.D., Dalrymple, R.L. & Zanne, A.E. 2019 What we (don't) know  
542 about global plant diversity. *Ecography* **42**, 1819-1831.

543 [7] Halewood, M., Chiurugwi, T., Sackville Hamilton, R., Kurtz, B., Marden, E., Welch, E.,  
544 Michiels, F., Mozafari, J., Sabran, M. & Patron, N. 2018 Plant genetic resources for food and  
545 agriculture: opportunities and challenges emerging from the science and information  
546 technology revolution. *New Phytologist* **217**, 1407-1419.

- 547 [8] Finch, K.N., Jones, F.A. & Cronn, R.C. 2019 Genomic resources for the Neotropical tree genus  
548 Cedrela (Meliaceae) and its relatives. *BMC genomics* **20**, 1-17.
- 549 [9] Finch, K.N., Cronn, R.C., Ayala Richter, M.C., Blanc-Jolivet, C., Correa Guerrero, M.C., De  
550 Stefano Beltrán, L., García-Dávila, C.R., Honorio Coronado, E.N., Palacios-Ramos, S. & Paredes-  
551 Villanueva, K. 2020 Predicting the geographic origin of Spanish Cedar (*Cedrela odorata* L.) based  
552 on DNA variation. *Conservation Genetics* **21**, 625-639.
- 553 [10] Group, C.P.W., Hollingsworth, P.M., Forrest, L.L., Spouge, J.L., Hajibabaei, M.,  
554 Ratnasingham, S., van der Bank, M., Chase, M.W., Cowan, R.S. & Erickson, D.L. 2009 A DNA  
555 barcode for land plants. *Proceedings of the National Academy of Sciences* **106**, 12794-12797.
- 556 [11] Holliday, J.A., Aitken, S.N., Cooke, J.E., Fady, B., González-Martínez, S.C., Heuertz, M.,  
557 Jaramillo-Correa, J.P., Lexer, C., Staton, M. & Whetten, R.W. 2017 Advances in ecological  
558 genomics in forest trees and applications to genetic resources conservation and breeding.  
559 (Wiley Online Library.
- 560 [12] Small, R.L., Ryburn, J.A., Cronn, R.C., Seelanan, T. & Wendel, J.F. 1998 The tortoise and the  
561 hare: choosing between noncoding plastome and nuclear Adh sequences for phylogeny  
562 reconstruction in a recently diverged plant group. *American Journal of Botany* **85**, 1301-1315.
- 563 [13] Särkinen, T., Staats, M., Richardson, J.E., Cowan, R.S. & Bakker, F.T. 2012 How to open the  
564 treasure chest? Optimising DNA extraction from herbarium specimens.
- 565 [14] Porebski, S., Bailey, L.G. & Baum, B.R. 1997 Modification of a CTAB DNA extraction protocol  
566 for plants containing high polysaccharide and polyphenol components. *Plant molecular biology*  
567 *reporter* **15**, 8-15.

- 568 [15] Buser, J.R., Zhang, X., Byrnes, S., Ladd, P., Heiniger, E., Wheeler, M., Bishop, J., Englund, J.,  
569 Lutz, B. & Weigl, B. 2016 A disposable chemical heater and dry enzyme preparation for lysis and  
570 extraction of DNA and RNA from microorganisms. *Analytical Methods* **8**, 2880-2886.
- 571 [16] Fredricks, D.N., Smith, C. & Meier, A. 2005 Comparison of six DNA extraction methods for  
572 recovery of fungal DNA as assessed by quantitative PCR. *Journal of clinical microbiology* **43**,  
573 5122-5128.
- 574 [17] Yager, P., Domingo, G.J. & Gerdes, J. 2008 Point-of-care diagnostics for global health. *Annu.*  
575 *Rev. Biomed. Eng.* **10**, 107-144.
- 576 [18] Pironon, S., Borrell, J.S., Ondo, I., Douglas, R., Phillips, C., Khoury, C.K., Kantar, M.B., Fumia,  
577 N., Soto Gomez, M. & Viruel, J. 2020 Toward unifying global hotspots of wild and domesticated  
578 biodiversity. *Plants* **9**, 1128.
- 579 [19] Wasser, S.K., Brown, L., Mailand, C., Mondol, S., Clark, W., Laurie, C. & Weir, B. 2015  
580 Genetic assignment of large seizures of elephant ivory reveals Africa's major poaching hotspots.  
581 *Science* **349**, 84-87.
- 582 [20] Holmes, H.R., Haywood, M., Hutchison, R., Zhang, Q., Edsall, C., Hall, T.L., Baisch, D.,  
583 Holliday, J. & Vlasisavljevich, E. 2020 Focused ultrasound extraction (FUSE) for the rapid  
584 extraction of DNA from tissue matrices. *Methods in Ecology and Evolution* **11**, 1599-1608.
- 585 [21] Xu, Z., Hall, T.L., Vlasisavljevich, E. & Lee Jr, F.T. 2021 Histotripsy: the first noninvasive, non-  
586 ionizing, non-thermal ablation technique based on ultrasound. *International Journal of*  
587 *Hyperthermia* **38**, 561-575.

- 588 [22] Bader, K.B., Vlaisavljevich, E. & Maxwell, A.D. 2019 For whom the bubble grows: physical  
589 principles of bubble nucleation and dynamics in histotripsy ultrasound therapy. *Ultrasound in*  
590 *medicine & biology* **45**, 1056-1080.
- 591 [23] Vlaisavljevich, E., Maxwell, A., Mancina, L., Johnsen, E., Cain, C. & Xu, Z. 2016 Visualizing the  
592 histotripsy process: Bubble cloud–cancer cell interactions in a tissue-mimicking environment.  
593 *Ultrasound in medicine & biology* **42**, 2466-2477.
- 594 [24] Mancina, L., Vlaisavljevich, E., Xu, Z. & Johnsen, E. 2017 Predicting tissue susceptibility to  
595 mechanical cavitation damage in therapeutic ultrasound. *Ultrasound in medicine & biology* **43**,  
596 1421-1440.
- 597 [25] Kim, Y., Maxwell, A.D., Hall, T.L., Xu, Z., Lin, K.-W. & Cain, C.A. 2014 Rapid prototyping  
598 fabrication of focused ultrasound transducers. *IEEE transactions on ultrasonics, ferroelectrics,*  
599 *and frequency control* **61**, 1559-1574.
- 600 [26] Parsons, J.E., Cain, C.A. & Fowlkes, J.B. 2006 Cost-effective assembly of a basic fiber-optic  
601 hydrophone for measurement of high-amplitude therapeutic ultrasound fields. *The Journal of*  
602 *the Acoustical Society of America* **119**, 1432-1440.
- 603 [27] Edsall, C., Ham, E., Holmes, H., Hall, T.L. & Vlaisavljevich, E. 2021 Effects of frequency on  
604 bubble-cloud behavior and ablation efficiency in intrinsic threshold histotripsy. *Physics in*  
605 *Medicine & Biology* **66**, 225009.
- 606 [28] Edsall, C., Khan, Z.M., Mancina, L., Hall, S., Mustafa, W., Johnsen, E., Klibanov, A.L., Durmaz,  
607 Y.Y. & Vlaisavljevich, E. 2021 Bubble cloud behavior and ablation capacity for histotripsy  
608 generated from intrinsic or artificial cavitation nuclei. *Ultrasound in Medicine & Biology* **47**, 620-  
609 639.

- 610 [29] Reisman, G., Wang, Y.-C. & Brennen, C.E. 1998 Observations of shock waves in cloud  
611 cavitation. *Journal of Fluid Mechanics* **355**, 255-283.
- 612 [30] Ikeda, T., Yoshizawa, S., Tosaki, M., Allen, J.S., Takagi, S., Ohta, N., Kitamura, T. &  
613 Matsumoto, Y. 2006 Cloud cavitation control for lithotripsy using high intensity focused  
614 ultrasound. *Ultrasound in medicine & biology* **32**, 1383-1397.
- 615 [31] Ma, J., Hsiao, C.-T. & Chahine, G.L. 2018 Numerical study of acoustically driven bubble  
616 cloud dynamics near a rigid wall. *Ultrasonics sonochemistry* **40**, 944-954.
- 617 [32] Otsu, N. 1979 A threshold selection method from gray-level histograms. *IEEE transactions*  
618 *on systems, man, and cybernetics* **9**, 62-66.
- 619 [33] Westbrook, J.W., Zhang, Q., Mandal, M.K., Jenkins, E.V., Barth, L.E., Jenkins, J.W.,  
620 Grimwood, J., Schmutz, J. & Holliday, J.A. 2020 Optimizing genomic selection for blight  
621 resistance in American chestnut backcross populations: A trade-off with American chestnut  
622 ancestry implies resistance is polygenic. *Evolutionary applications* **13**, 31-47.
- 623 [34] Elshire, R.J., Glaubitz, J.C., Sun, Q., Poland, J.A., Kawamoto, K., Buckler, E.S. & Mitchell, S.E.  
624 2011 A robust, simple genotyping-by-sequencing (GBS) approach for high diversity species. *PLoS*  
625 *one* **6**, e19379.
- 626 [35] Catchen, J., Hohenlohe, P.A., Bassham, S., Amores, A. & Cresko, W.A. 2013 Stacks: an  
627 analysis tool set for population genomics. *Molecular ecology* **22**, 3124-3140.
- 628 [36] Schoch, C.L., Ciufo, S., Domrachev, M., Hotton, C.L., Kannan, S., Khovanskaya, R., Leipe, D.,  
629 Mcveigh, R., O'Neill, K. & Robbertse, B. 2020 NCBI Taxonomy: a comprehensive update on  
630 curation, resources and tools. *Database* **2020**.

- 631 [37] McKenna, A., Hanna, M., Banks, E., Sivachenko, A., Cibulskis, K., Kernytsky, A., Garimella,  
632 K., Altshuler, D., Gabriel, S. & Daly, M. 2010 The Genome Analysis Toolkit: a MapReduce  
633 framework for analyzing next-generation DNA sequencing data. *Genome research* **20**, 1297-  
634 1303.
- 635 [38] Poplin, R., Ruano-Rubio, V., DePristo, M.A., Fennell, T.J., Carneiro, M.O., Van der Auwera,  
636 G.A., Kling, D.E., Gauthier, L.D., Levy-Moonshine, A. & Roazen, D. 2018 Scaling accurate genetic  
637 variant discovery to tens of thousands of samples. *BioRxiv*, 201178.
- 638 [39] Mørch, K.A. 2015 Cavitation inception from bubble nuclei. *Interface Focus* **5**, 20150006.
- 639 [40] Atchley, A.A. & Prosperetti, A. 1989 The crevice model of bubble nucleation. *The Journal of*  
640 *the Acoustical Society of America* **86**, 1065-1084.
- 641 [41] Miller, D.L. 1983 The botanical effects of ultrasound: A review. *Environmental and*  
642 *Experimental Botany* **23**, 1-27.
- 643 [42] Miller, D.L. 1977 The effects of ultrasonic activation of gas bodies in Elodea leaves during  
644 continuous and pulsed irradiation at 1 MHz. *Ultrasound in medicine & biology* **3**, 221-240.
- 645 [43] Xu, Z., Fowlkes, J.B. & Cain, C.A. 2006 A new strategy to enhance cavitation tissue erosion  
646 using a high-intensity, initiating sequence. *IEEE transactions on ultrasonics, ferroelectrics, and*  
647 *frequency control* **53**, 1412-1424.
- 648 [44] Pishchalnikov, Y.A., McAteer, J.A., Bailey, M.R., Pishchalnikova, I.V., Williams Jr, J.C. & Evan,  
649 A.P. 2006 Acoustic shielding by cavitation bubbles in shock wave lithotripsy (SWL). In *AIP*  
650 *Conference Proceedings* (pp. 319-322, American Institute of Physics).

651 [45] Maeda, K., Maxwell, A.D., Colonus, T., Kreider, W. & Bailey, M.R. 2018 Energy shielding by  
652 cavitation bubble clouds in burst wave lithotripsy. *The Journal of the Acoustical Society of*  
653 *America* **144**, 2952-2961.

654 [46] Goralka, R.J., Schumaker, M.A. & Langenheim, J.H. 1996 Variation in chemical and physical  
655 properties during leaf development in California bay tree (*Umbellularia californica*): Predictions  
656 regarding palatability for deer. *Biochemical Systematics and Ecology* **24**, 93-103.

657
